# Supplementary material for: Discovery of the Yb2+–Yb3+ couple as red-to-NIR persistent luminescence emitters in Yb-activated (Ba1−xSrx)AlSi5O2N7 phosphors
Source: Royal Society of Chemistry journal article supplement (doi:10.1039/c7tc01600j), 2017-01-01
Supplement: c7tc01600j1.pdf [file c7tc01600j1.pdf]

## Electronic Supplementary Information

### Discovery of $\text{Yb}^{2+}$ - $\text{Yb}^{3+}$ couple as red-to-NIR persistent luminescence emitters in Yb-activated $(\text{Ba}_{1-x}\text{Sr}_x)\text{AlSi}_5\text{O}_2\text{N}_7$ phosphors

Ying Lv,<sup>a</sup> Le Wang,<sup>\*,b</sup> Yixi Zhuang,<sup>\*,a</sup> Tian-Liang Zhou,<sup>a</sup> and Rong-Jun Xie<sup>\*,a,c</sup>

<sup>a</sup>College of Materials, Xiamen University, Simingnan-Road 422, Xiamen 361005, P. R. China

<sup>b</sup>College of Optics and Electronic Science and Technology, China Jiliang University, Hangzhou, Zhejiang 310018, China.

<sup>c</sup>Sialon Group, National Institute for Materials Science, 1-1 Namiki, Tsukuba, Ibaraki 305-0044, Japan

\*rjxie@xmu.edu.cn; Xie.Rong-Jun@nims.go.jp; zhuangyixi@xmu.edu.cn; calla@cjl.u.edu.cn

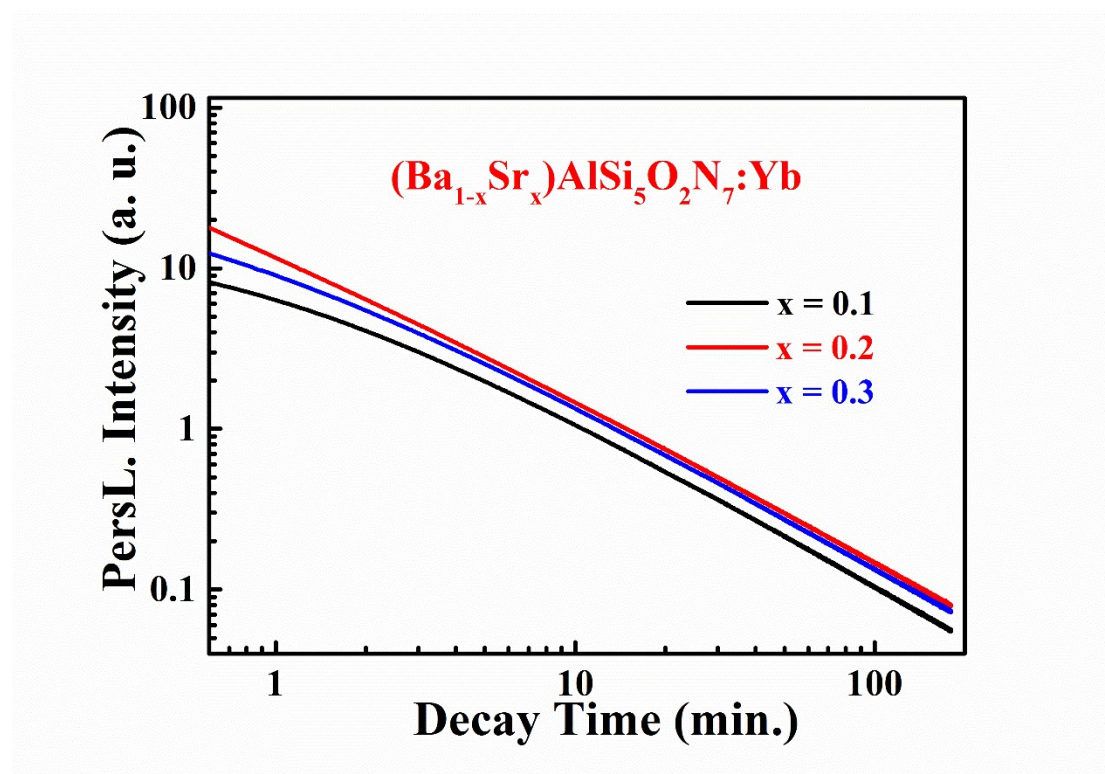

Figure S1. PersL decay curves of  $(\text{Ba}_{1-x}\text{Sr}_x)\text{AlSi}_5\text{O}_2\text{N}_7:\text{Yb}$  ( $x = 0.1, 0.2, 0.3$ ).
